# Supplementary material for: Health Impacts of Exposure to Gaseous Pollutants and Particulate Matter in Beijing—A Non-Linear Analysis Based on the New Evidence
Source: MDPI journal article supplement (doi:10.3390/ijerph15091969), 2018-09-10
Supplement: s1 [file s1]

### Supplementary materials for sensitivity analysis

Figure 1 and Figure 2 present the results from a single-pollutant model for NO<sub>2</sub> at lag 1 as an example, since other lags generated similar trends. The results for other pollutants were also robust with respect to different variable settings, i.e. degrees of freedom, time and temperature trends adjustments, etc.

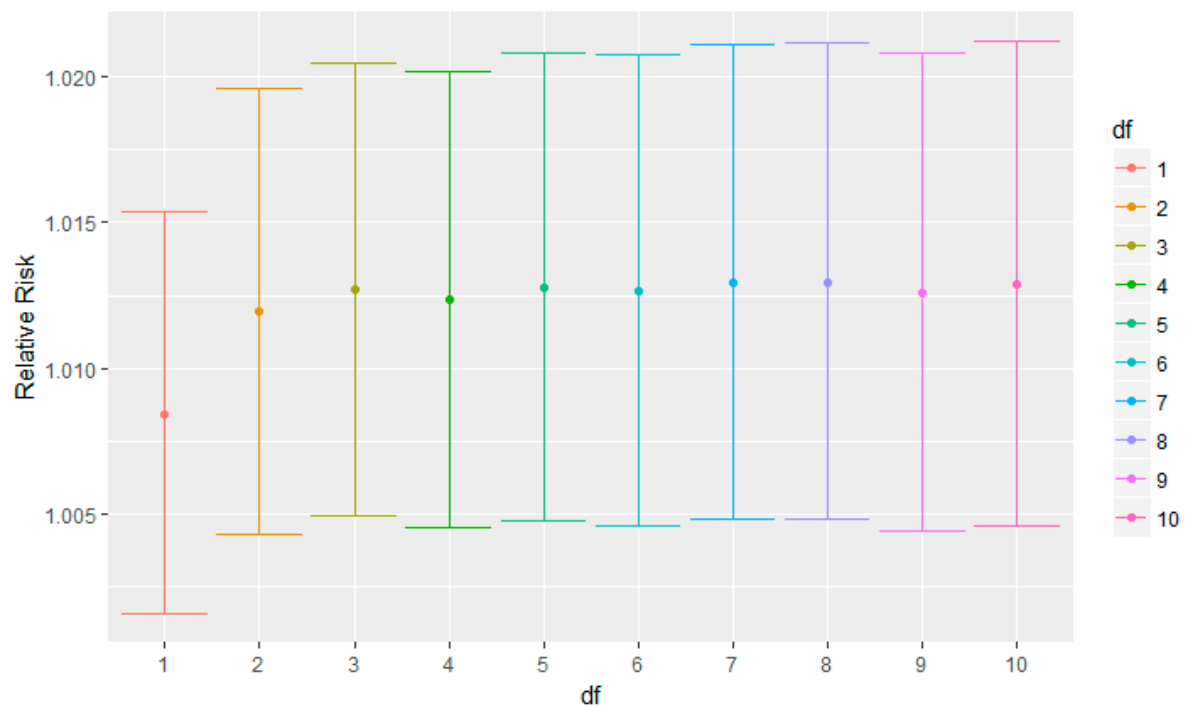

**Figure S1.** Relative Risks with 10 µg/m<sup>3</sup> increase of NO<sub>2</sub> by degrees of freedom of time trends.

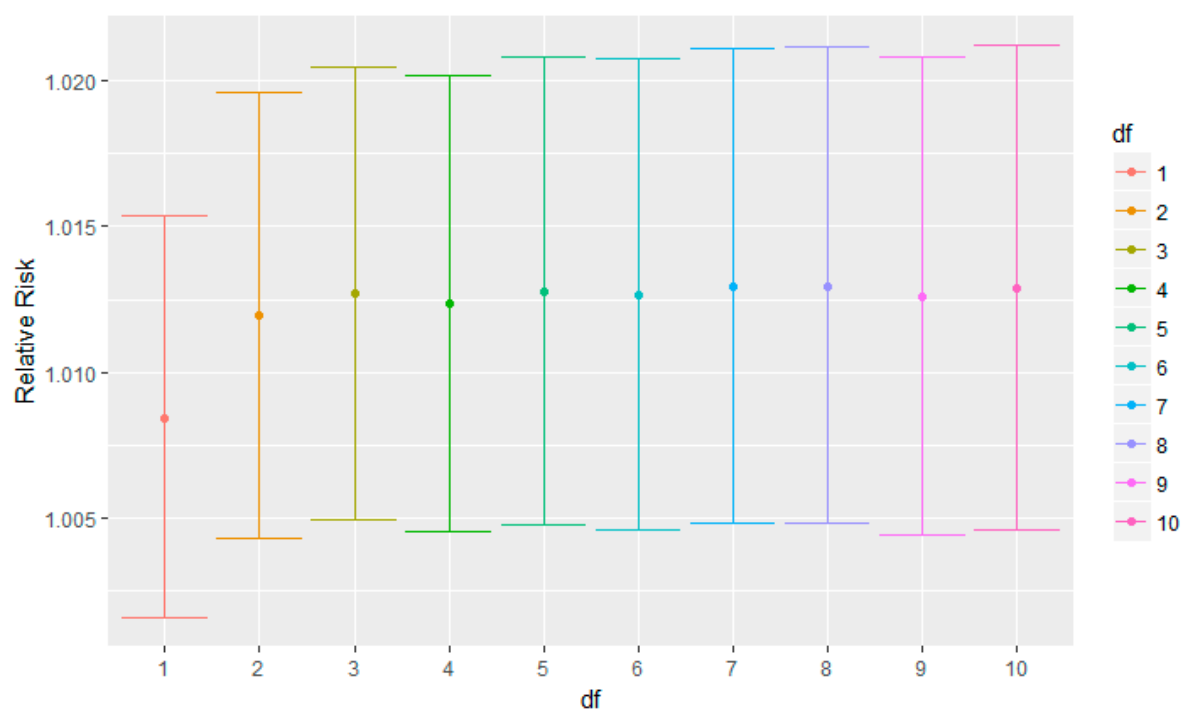

**Figure S2.** Relative Risks with 10 µg/m<sup>3</sup> increase of NO<sub>2</sub> by degrees of freedom of temperature.
